# Supplementary material for: Optimization of Constitutive Promoters Using a Promoter-Trapping Vector in Burkholderia pyrrocinia JK-SH007
Source: MDPI journal article supplement (doi:10.3390/ijms24119419), 2023-05-29
Supplement: s1 [file s1]

# Optimization of Constitutive Promoters Using a Promoter-Trapping Vector in *Burkholderia pyrrocinia* JK-SH007

Xue-Lian Wu <sup>1,2,†</sup>, Xiao-Wei Liu <sup>1,2,†</sup>, Yang Wang <sup>3</sup>, Meng-Yun Guo <sup>4</sup> and Jian-Ren Ye <sup>1,2,\*</sup>

<sup>1</sup> Co-Innovation Center for Sustainable Forestry in Southern China, College of Forestry, Nanjing Forestry University, Nanjing 210037, China; xuelianwuletter@163.com (X.-L.W.); njfulxw@163.com (X.-W.L.)

<sup>2</sup> Jiangsu Key Laboratory for Prevention and Management of Invasive Species, Nanjing Forestry University, Nanjing 210037, China

<sup>3</sup> Institute of Forest Pest Control, Jiangxi Academy of Forestry, Nanchang 330032, China; wy21sj@163.com

<sup>4</sup> Key Laboratory for Bio-Resources and Eco-Environment of Ministry of Education, College of Life Science, Sichuan University, Chengdu 610065, China; mengyun\_guo@163.com

\* Correspondence: jrye@njfu.edu.cn

† These authors contributed equally to this work.

## SUPPLEMENTARY MATERIAL

### Supplementary Tables

Table S1 Primers used in this study.

Table S2 Promoter sequences selected in this study.

### Supplementary Figures

Figure S1 Trap vector with two reporter genes.

Figure S2 Growth curves of *B. pyrrocinia* JK-SH007.

Figure S3 Growth curves of *E. coli* S17-1.

Figure S4 Assay of constitutive promoters from *E. coli* S17-1 using firefly luciferase.

Figure S5 Promoter characterization via qPCR analysis in *E. coli* S17-1.

Figure S6 Growth curves of *B. multivorans* WS-FJ9.

Figure S7 Assay of constitutive promoters from *B. multivorans* WS-FJ9 using firefly luciferase.

Figure S8 Promoter characterization via qPCR analysis in *B. multivorans* WS-FJ9.

**Table S1.** Primers used in this study.

| Primers                | Primer sequences (5'-3')                                | Source                                                                         |
|------------------------|---------------------------------------------------------|--------------------------------------------------------------------------------|
| P4-F                   | <i>GGCCTTTCGTTTTATAAGCTTTTCCTCTCTAGGGAGGTG</i>          | pBBR1-GM <sup>r</sup> -P4-Luc-TP <sup>r</sup>                                  |
| P4-R                   | <i>TGGTAAATTACTCGAGGCGCCAACTGCGGTAGCTGCAATGA</i>        |                                                                                |
| P9-F                   | <i>GGCCTTTCGTTTTATAAGCTTGGCTCACCGGCCGGC</i>             | pBBR1-GM <sup>r</sup> -P9-Luc-TP <sup>r</sup>                                  |
| P9-R                   | <i>TGGTAAATTACTCGAGGCGCCCCACAGTACCGCGAAGGAT</i>         |                                                                                |
| P10-F                  | <i>GGCCTTTCGTTTTATAAGCTTCAACCGGCTGCGCATTCC</i>          | pBBR1-GM <sup>r</sup> -P10-Luc-TP <sup>r</sup>                                 |
| P10-R                  | <i>TGGTAAATTACTCGAGGCGCCGGTGTCTCGGATTGTGC</i>           |                                                                                |
| P14-F                  | <i>GGCCTTTCGTTTTATAAGCTTTTTTCCGCACGCCGGCGCCG</i>        | pBBR1-GM <sup>r</sup> -P14-Luc-TP <sup>r</sup>                                 |
| P14-R                  | <i>TGGTAAATTACTCGAGGCGCCGGGCACGCTCCTGTTGG</i>           |                                                                                |
| P15-F                  | <i>GGCCTTTCGTTTTATAAGCTTGCAGACGGTTCCAAAAACG</i>         | pBBR1-GM <sup>r</sup> -P15-Luc-TP <sup>r</sup>                                 |
| P15-R                  | <i>TGGTAAATTACTCGAGGCGCCACAACCACCTTCGAATCCTTT</i>       |                                                                                |
| P17-F                  | <i>GGCCTTTCGTTTTATAAGCTTCCCGCAGCAGCGAACCC</i>           | pBBR1-GM <sup>r</sup> -P17-Luc-TP <sup>r</sup>                                 |
| P17-R                  | <i>TGGTAAATTACTCGAGGCGCCGTTGTTCTCCTTCAGGTTTCTCAG</i>    |                                                                                |
| P18-F                  | <i>GGCCTTTCGTTTTATAAGCTTCGACTTGATCGAACCCGTG</i>         | pBBR1-GM <sup>r</sup> -P18-Luc-TP <sup>r</sup>                                 |
| P18-R                  | <i>TGGTAAATTACTCGAGGCGCCGTCCTGTTTCTTGCTGATTCTG</i>      |                                                                                |
| P19-F                  | <i>GGCCTTTCGTTTTATAAGCTTCCCGCCCCGAAGCGCC</i>            | pBBR1-GM <sup>r</sup> -P19-Luc-TP <sup>r</sup>                                 |
| P19-R                  | <i>TGGTAAATTACTCGAGGCGCCAAAGATTCCGTTTTTGCATCGTT</i>     |                                                                                |
| PT1-F                  | <i>TCGACCTCGAGGGGGGGCCCGGTACCCAGCTTTTGTTCCTTTA</i>      | pBBR1-GM <sup>r</sup> -PRPL larger fragment [1]                                |
| PT1-R                  | <i>CAGCCCGGGGGATCCACTAGTTCTAGAGCGGCCGCCA</i>            |                                                                                |
| PRPL-F                 | <i>GCGCGTAATACGACTCACTATAG</i>                          | <i>PrPl</i> smaller fragment [2]                                               |
| PRPL-R                 | <i>TTGGCATCTTCCATGTATGAGTCTCCAGTTTGTTCAGTT</i>          |                                                                                |
| Luc-TP <sup>r</sup> -F | <i>CTGAAACAAACTGGAGACTCATACATGGAAGATGCCAAAAACATTAAG</i> | Luc-TP <sup>r</sup> smaller fragment [2]                                       |
| Luc-TP <sup>r</sup> -R | <i>TAAAGGGAACAAAAGCTGGGTACCGGGCCCCCCCCCTCGAG</i>        |                                                                                |
| PTC1-F                 | <i>GCGCGTAATACGACTCACTATAG</i>                          | pBBR1-GM <sup>r</sup> -PRPL-Luc-TP <sup>r</sup> colony PCR check               |
| PTC1-R                 | <i>GGCTCGTATGTTGTGTGGAA</i>                             |                                                                                |
| PT2-F                  | <i>GGCGCCTCGAGTAATTTA</i>                               | pBBR1-GM <sup>r</sup> -Luc-TP <sup>r</sup> larger fragment                     |
| PT2-R                  | <i>AAGCTTATAAAACGAAAGGCC</i>                            |                                                                                |
| PTC2-F                 | <i>GCGCGTAATACGACTCACT</i>                              | pBBR1-GM <sup>r</sup> -Promoter-Luc-TP <sup>r</sup> colony PCR check           |
| PTC2-R                 | <i>ATGTTGCATCACCTTCACC</i>                              |                                                                                |
| PT3-F                  | <i>GAATTCTTTGCTTGTCGCC</i>                              | pBBR1-GM <sup>r</sup> -GFP-TP <sup>r</sup> larger fragment <i>gfp</i> fragment |
| PT3-R                  | <i>TATGAGTCTCCAGTTTGTTCAGTT</i>                         |                                                                                |
| <i>gfp</i> -F          | <i>AACAAACTGGAGACTCATAATGAGTAAAGGAGAAGAAGT</i>          |                                                                                |
| <i>gfp</i> -R          | <i>TTATGGCGACAAGCAAAGAATTCTTATTTGTATAGTTCATCCAT</i>     | <i>rfp</i> fragment                                                            |
| <i>rfp</i> -F          | <i>TGAAACAAACTGGAGACTCATAATATAGCATGCGGGTCTTCCAA</i>     |                                                                                |
| <i>rfp</i> -R          | <i>ATTATGGCGACAAGCAAAGAATTCTTAAAGGAACAGATGGTGGC</i>     |                                                                                |
| qRT- <i>luc</i> -F     | <i>GCTCAGCAAGGAGGTAGGTG</i>                             | qPCR for <i>luc</i> gene                                                       |
| qRT- <i>luc</i> -R     | <i>CCAGTGTCTTACCGGTGTCC</i>                             |                                                                                |
| qRT- <i>pyrG</i> -F    | <i>AGTCACCCTCCTCAAACCTCG</i>                            | qPCR for <i>pyrG</i> gene [3]                                                  |
| qRT- <i>pyrG</i> -R    | <i>TCGTGAAGTTGTTGGCCTTG</i>                             |                                                                                |
| qRT-16SrRNA-F          | <i>GATGACCAGCCACACTGGAA</i>                             | qPCR for <i>E.coli</i> 16SrRNA gene                                            |
| qRT-16SrRNA-R          | <i>GGAGTTAGCCGGTGCTTCTT</i>                             |                                                                                |
| qRT-16SrRNA-F          | <i>CCTACCAAGGCGACGATCAG</i>                             | qPCR for <i>B.multivorans</i> 16SrRNA gene                                     |
| qRT-16SrRNA-R          | <i>CAAAATTCCTCCACTGCTGCC</i>                            |                                                                                |

The homology arms are in italic.

**Table S2.** Promoter sequences selected in this study.

| Promoter | Promoter sequence                                                                                                                                                                                                                                                                                                                                                                                                                                                                                                                                                                                                                                                                                                                                                                                                                                                                                                                                                                                                                                                                                                                                                                                                                                                                                                                                                                                                                                                                                |
|----------|--------------------------------------------------------------------------------------------------------------------------------------------------------------------------------------------------------------------------------------------------------------------------------------------------------------------------------------------------------------------------------------------------------------------------------------------------------------------------------------------------------------------------------------------------------------------------------------------------------------------------------------------------------------------------------------------------------------------------------------------------------------------------------------------------------------------------------------------------------------------------------------------------------------------------------------------------------------------------------------------------------------------------------------------------------------------------------------------------------------------------------------------------------------------------------------------------------------------------------------------------------------------------------------------------------------------------------------------------------------------------------------------------------------------------------------------------------------------------------------------------|
| P4       | <p><u>C</u>ATTTCCTCCTCTAGGGAGGTGGGCAGGGTCTCTTTGGCGAATTGATCCATGTATCCGTATCGTTTCGGAGCG<br/> AAGACGGCGAACGCCTTTCGCGTGGGCGTGCATGCGCAACGCAACGCGAGATTCTAACATGCGCCCATC<br/> AGCCGCAAATTCGCCTCCCCCTCTATATATAAATAGCGAAAATCGCGGCGGCGGCGGACCGGCCGGAACCG<br/> CACGCGACTCGACGCCACCGTTGATCGCGCCCGGTTTACCGGCGATCCCACCCGGTTTGTTTCACGCGCAC<br/> GAGTAAACAGTTGCCCCGACCCGCGCAATTCGCCGCGCACTCTTGACAATCTCTAAAAGTTGCGGCAGG<br/> CCGGTGTTCGCGATGCACCACAAAGTTGAGGGGATCTTAGGGTGGGGAGGATTTTTTTTCGTAGGAAGGGA<br/> ACGATATGGCAAATGCCAACGCACTGAAAGTTAGACGCTGCTCGAAGTCTACACAGAGCGGTGCCGCGT<br/> TTTTTGTGCCGCACCAATGTTATACTTCGAGCAATGTATGACTTGTACCCGTCAACAGGCTCGCAGTAAACC<br/> TGCGGTAATCTCAATTCGAGAGGAGAAATATGAATAAACTTTCAAAGCTCGCGTTCATTGCAGTACCGCA<br/> GTTATG</p> <p><u>C</u>ACGGCTCACCGGCCGGGCGGGGCTGACGCGCGCCCCGGCAGTCCCGATCTGGCATAACGGCCCGCGATC<br/> GCGTCGATCGCACCTCTGGCACGAGGCGGCGGCAGCCGCCGAGGACGGGCGTCCGCGGCACAGGATCGG<br/> GAAGTTCCCAGTGTGGGGCCCGATCGCGTGCAAGTCTGTCCCGAAAAGTTTCGTGAAAAGTGTGCCGATTTGT<br/> GCGCGATTGTTCGGAGTGTGTCGTTCCGGCCGCGCCGTCAAAACGCTGAAACATCGGGTCGGACCGCATCCC<br/> GGCAGTGCCGATTGCGTCGATCGGCCCGGTTCCGGCGGCGGCCGAGCGCGACAGATCGACGCGCCCC<br/> GGCCATGTCATCCCATGTCTCGAACGTCGCCGATGCTTGCCTCGACACCGCAAGCGCTGATGCCACGTGCG<br/> TTTGCGCGCGCCGCCGAAATGTCCGCGGATCGTCAGACGTCGTTTCATCTGAAACCGCAATGGACTCAGTAT<br/> CGATTTATTGCGGATTATCGCTTTCGCTTTACACCCAGTCTATCTAGACTATTCAAGTCCAAACGGTCAAATTC<br/> GTCCTTTTTTCAGGAGACGATCCAATGCGCCTCACCATTCTGAATTAATGGCAGCGAATCGGCAACCCGGCA<br/> ATCCTTCGCGGTAATGTGGGTG</p> |
| P9       | <p><u>T</u>GACAACCGGCTGCGCATTCTCTGACAATTTCCAAGATGCTGGCGCTCTTTATAAGCAAAAGCGCCCGGTT<br/> TTTCAATCCCGTCGATCAAGAAACCGTTACCACGTCTAAATGGCGCTTTTTCGCGCCGCCAACCTGTAAGAG<br/> TTACCAGTTACCGCCCCCTCGTGCCGCGCGATGTAATGCATGCATACAAAAGCACAAATCCGAGGACACC<br/> ATG</p>                                                                                                                                                                                                                                                                                                                                                                                                                                                                                                                                                                                                                                                                                                                                                                                                                                                                                                                                                                                                                                                                                                                                                                                                                                         |
| P10      | <p><u>T</u>GATTTTCCGCACGCCGGCGCCGGCGCGCCGTTTCATACGGCCGCGCCAGTTTTTTCCATTGCGACCCGC<br/> AATTCATCCGATCGTTGATTTTGTCAATAATAATCCCGGAAAACGATTTTCATAATAAATCCGGAAAAATCGATT<br/> ACATAAGTGCTGCTCCATTTTCAATGATCGCCGGTTTTCTAATAAACGGAATAGTGAATTGGTAAATGTTGA<br/> GCAAGGTCACGATGCGCTATGCTGTAAAAAGGTAAAAAGAAAATGCGGGACAGAGTGCCGCGGTATTTTTT<br/> TCTCTGCGATGTTCGGCGCATCGCAGGCTTGGGCGGCCGCTCGAAATGAAATAAGGGTTTACACCTAGCATT<br/> ATGCCATTTTATTGACAATTAATCGATCTAGAATGACATCCTCCAACTTCCCGTACTCAAATGAGTGGCGGGT<br/> TGTCATAAAGTAAGCCGGCTTTTGATCTGGCTTCTATTTTTCTTTACGTGCTCTCTCGCATTGCCAACAGGAG<br/> CGTGCCCCGATG</p>                                                                                                                                                                                                                                                                                                                                                                                                                                                                                                                                                                                                                                                                                                                                                                                                                                                                                                   |
| P14      | <p><u>C</u>ATGCGGACGGTTCCAAAAACGGCGCCCCCAGGCGGGGCGCCCCGAAAAAGTTTCAAGGTGAAAAAGCTG<br/> CGCGCGACGAACGACGATGGCGCAGATGACGTAGCAGACTAATCAGGGAACAATTCAGCCGGTGTGCCCCG<br/> CGCGGATTGCTCTCCGTACGGTGCGCAGCGCCCGTTATCTGTTTATAATCAAAGCAATTTAAAGGATTCTGA<br/> AGGTGGTTGTATG</p>                                                                                                                                                                                                                                                                                                                                                                                                                                                                                                                                                                                                                                                                                                                                                                                                                                                                                                                                                                                                                                                                                                                                                                                                                               |
| P15      | <p><u>T</u>AACCCGACGAGCGAACCCTGACATGATGGAGCAGCCGGCGGCCTCTCGGCCCGGCCCAAGGTTTAG<br/> GAGCAAGAACGCCTGATGCAAAGCATGCCCGGTGCCTTAGCGGCCCAACGACACGACAGGCACTTTGCGA<br/> ACCCTTCAGTGGGATGGGCAAACTTCCCTCCGATAAAGCGGACGGCCGTGTGGCGGTCCGCTTGATCAAG<br/> CGATTAGGGGTAGCGGCGCGAGGTGCGCCGGTACCGACTTGATTGCGCGCGGAGGCCATGTGGTCACGC<br/> GCGCCATACCGTATTCATTAGCGTAAGCGCGCGGTATCCGCGTACGCCGATGAATAGCCCGCTTCGAAGCGC<br/> ACGTCTGAAACAGCGTCCGCGGGAAGCGGGTTTTGACGAAGGGTGTAGTTTGAAGTACTCTCATCTGAAC<br/> CTGAAGGAGAACAACATG</p>                                                                                                                                                                                                                                                                                                                                                                                                                                                                                                                                                                                                                                                                                                                                                                                                                                                                                                                                                                                           |
| P17      | <p><u>T</u>AACGACTTGATCGAACCCGTGGAACAGTAGCGACCGCCCCGAATACGAAACGACGCGGGAAGGCACC<br/> GCTCGCCCATCGTTTCACGGCAACCCGGCGATGGGGGCACGTGCGGCACGGCTCCGCCCACCAAGAAACA<br/> AATTCCACCATTCCACATTAAAAGAAAACGTTATTCCATATCAAGCTGGATCACCGACCTATTTGGATCCAT<br/> TTTCCCTCCTGTCCCCCGTATCATTTCTCCATTGAGAATCAGCAAGAAACGGACATG</p>                                                                                                                                                                                                                                                                                                                                                                                                                                                                                                                                                                                                                                                                                                                                                                                                                                                                                                                                                                                                                                                                                                                                                                                      |
| P18      | <p><u>T</u>GACCCGCCCCGAAGCGCCGTGCGCGCCCGATTGTCGCGCCTTGTTCCTCGCACGCCGACCCGCGCGGGGC<br/> GCGTCGGCGCGCGGCCCGCGATCCGATCGGTCCGTTGGTGCAGCGACACCGCCACCCCGATTGACGCT<br/> CTTTCACGCACGAACGAAAAGGGGTTGTAATCCGCTGTGATATAACTGCCGACGTGATCCGCTCCTTGAGC<br/> GAGACTCACTCCGAACGTCATCCGATGGAGAATAACGATGCAAAAACGGAATCTTGTG</p>                                                                                                                                                                                                                                                                                                                                                                                                                                                                                                                                                                                                                                                                                                                                                                                                                                                                                                                                                                                                                                                                                                                                                                                     |
| P19      |                                                                                                                                                                                                                                                                                                                                                                                                                                                                                                                                                                                                                                                                                                                                                                                                                                                                                                                                                                                                                                                                                                                                                                                                                                                                                                                                                                                                                                                                                                  |

The underlined letters are the initiation and termination codons.

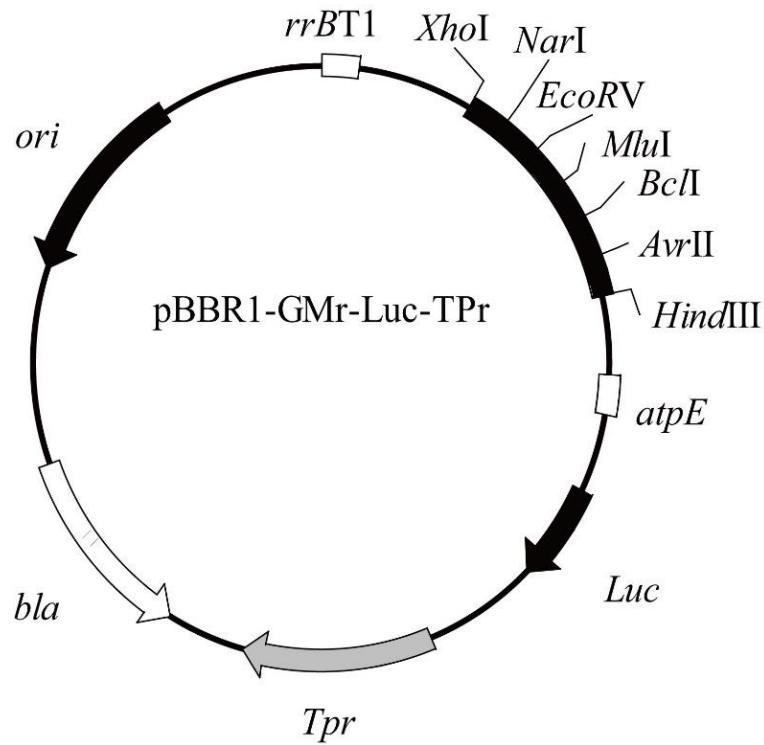

**Figure S1.** Trap vector with two reporter genes. The vector contains the Tp-resistant dihydrofolate reductase gene (*TPr*) and the luciferase gene set (*Luc*). The most relevant restriction sites that can be introduced into the promoter region are provided. *ori*, origin of replication; *bla*, gene encoding the ampicillin resistance (AmpR) protein; *atpE*, translation initiation region; *rrnBT1*, transcriptional terminator.

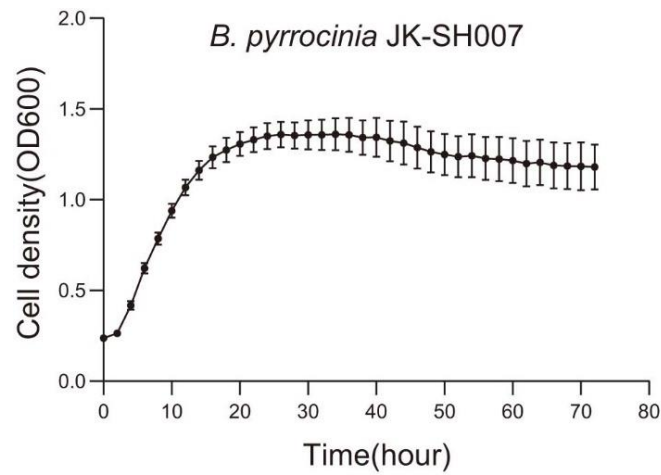

**Figure S2.** Growth curves of *B. pyrrocinia* JK-SH007. *B. pyrrocinia* JK-SH007 were cultured on LB medium. The standard deviations of the 10 independent replicates are indicated by the error bars.

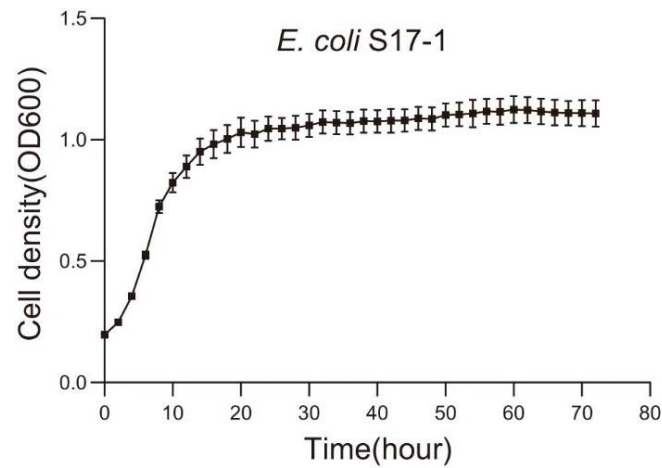

**Figure S3.** Growth curves of *E. coli* S17-1. *E. coli* S17-1 were cultured on LB medium. The standard deviations of the 10 independent replicates are indicated by the error bars.

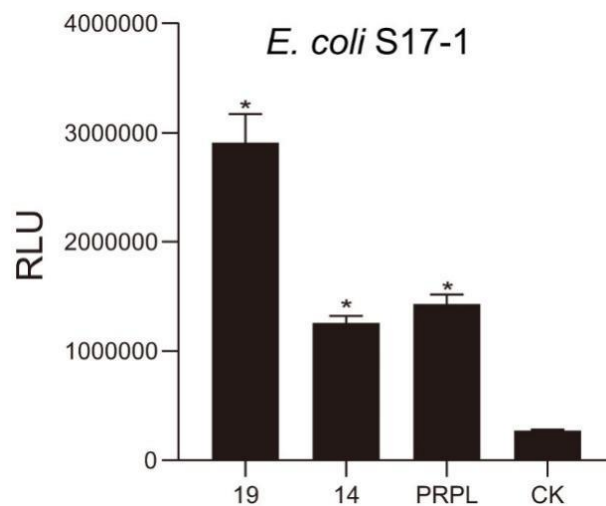

**Figure S4.** Assay of constitutive promoters from *E. coli* S17-1 using firefly luciferase. PRPL was used as the control variable. CK was a luciferase-specific positive control. The standard deviations from three separate replicates are indicated by the error bars. The data represent means  $\pm$  SD ( $n = 4$ ). \*  $p < 0.05$ .

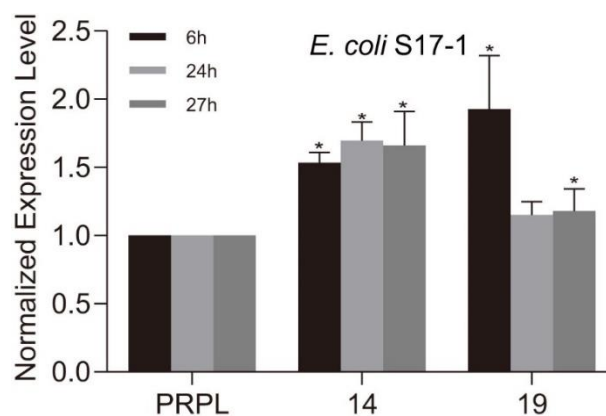

**Figure S5.** Promoter characterization via qPCR analysis in *E. coli* S17-1. In three different periods, the transcription of the firefly luciferase gene under strong promoters in JK-SH007 was measured. The y-axis depicts the expression value of PRPL, which was set to 1. The standard deviations from three separate replicates are indicated by the error bars. The data represent means  $\pm$  SD ( $n = 4$ ). \*  $p < 0.05$ .

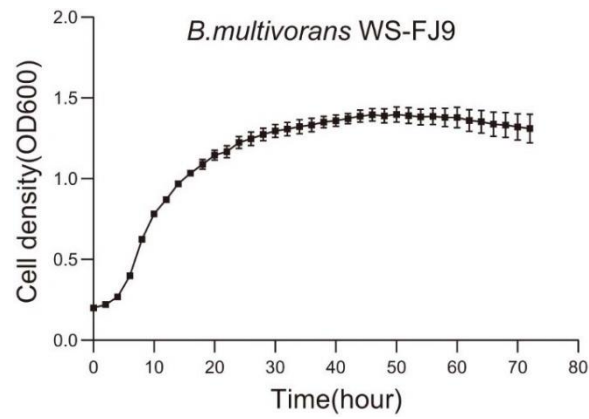

**Figure S6.** Growth curves of *B. multivorans* WS-FJ9. *B. multivorans* WS-FJ9 were cultured on LB medium. The standard deviations of the 10 independent replicates are indicated by the error bars.

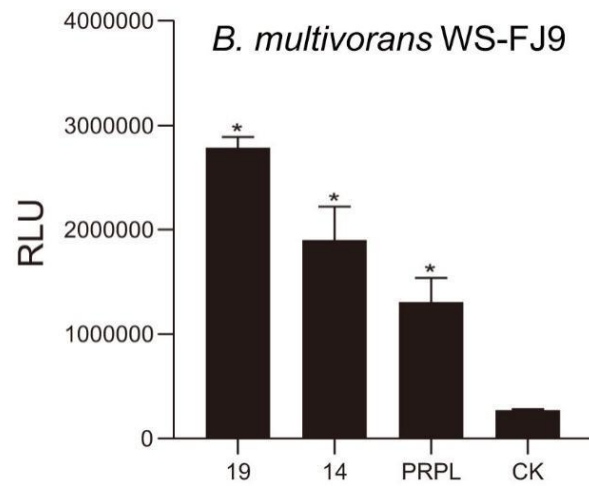

**Figure S7.** Assay of constitutive promoters from *B. multivorans* WS-FJ9 using firefly luciferase. PRPL was used as the control variable. CK was a luciferase-specific positive control. The standard deviations from three separate replicates are indicated by the error bars. The data represent means  $\pm$  SD ( $n = 4$ ). \*  $p < 0.05$ .

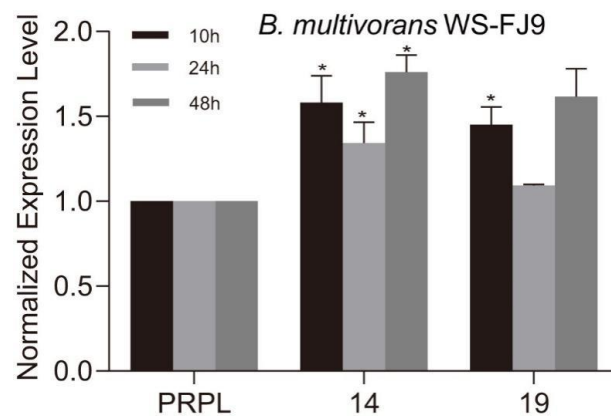

**Figure S8.** Promoter characterization via qPCR analysis in *B. multivorans* WS-FJ9. In three different periods, the transcription of the firefly luciferase gene under strong promoters in JK-SH007 was measured. The y-axis depicts the expression value of PRPL, which was set to 1. The standard deviations from three separate replicates are indicated by the error bars. The data represent means  $\pm$  SD ( $n = 4$ ). \*  $p < 0.05$ .

## References

1. Kovach, M.E.; Elzer, P.H.; Hill, D.S.; Robertson, G.T.; Farris, M.A.; Roop, R.M.; Peterson, K.M. Four new derivatives of the broad-host-range cloning vector pBBR1MCS, carrying different antibiotic-resistance cassettes. *Gene* **1995**, *166*, 175–176, [https://doi.org/10.1016/0378-1119\(95\)00584-1](https://doi.org/10.1016/0378-1119(95)00584-1).
2. Tomlin, K.L.; Clark, S.R.; Ceri, H. Green and red fluorescent protein vectors for use in biofilm studies of the intrinsically resistant *Burkholderia cepacia* complex. *J. Microbiol. Methods* **2004**, *57*, 95–106, <https://doi.org/10.1016/j.mimet.2003.12.007>.
3. He, L.-M.; Ye, J.-R.; Ren, J.-H.; Huang, L.; Wu, X.-Q. Enhancement of antifungal activity of *Burkholderia pyrrocinia* JK-SH007 genetically modified with *Bacillus subtilis* Chi113 gene. *For. Pathol.* **2016**, *46*, 632–642, <https://doi.org/10.1111/efp.12283>.
